# Supplementary material for: Mechanisms Restricting Diffusion of Intracellular cAMP
Source: PubMed Central journal article supplement (PMC4726171; doi:10.1038/srep19577), 2016-01-22
Supplement: srep19577-s1.pdf [file srep19577-s1.pdf]

## **Mechanisms Restricting Diffusion of Intracellular cAMP**

**Shailesh R. Agarwal<sup>1,\*</sup>, Colleen E. Clancy<sup>2</sup>, and Robert D. Harvey<sup>1</sup>**

**<sup>1</sup>Department of Pharmacology  
University of Nevada School of Medicine  
Reno, NV 89557**

**<sup>2</sup>Department of Pharmacology  
University of California, Davis  
Davis, CA 95616**

**\*To whom correspondence should be addressed. Email: [sagarwal@unr.edu](mailto:sagarwal@unr.edu)**

## SUPPLEMENTARY INFORMATION

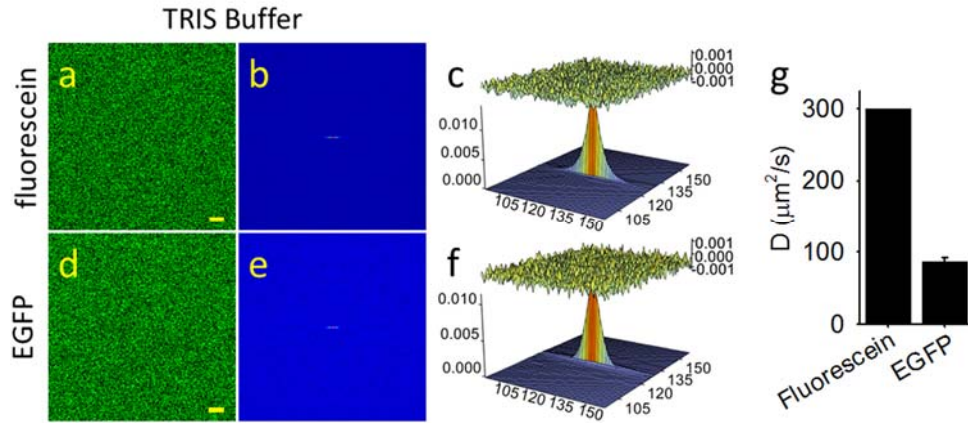

### Supplementary Fig. S1. Calibration of microscope using RICS analysis of fluorescein and EGFP in Tris buffer.

Representative confocal images of fluorescein (a) and EGFP (d) in Tris buffer (scale bar 1  $\mu\text{m}$ ). (b, e) Average of the spatial correlation calculated for each of 100 images of fluorescein (b) and EGFP (e) in Tris buffer. Fit of the correlation functions for fluorescein (c) and EGFP (f). The plot at the top of those panels represents the difference between the autocorrelation and the fit. (g) Bar plots of the diffusion coefficient values for fluorescein and EGFP (average  $\pm$  s.e.m.). The known value of D for fluorescein in Tris buffer ( $300 \mu\text{m}^2/\text{sec}$ ) was fixed to obtain beam waist ( $\omega_0$ ). The diffusion coefficient for EGFP in Tris buffer was calculated using the  $\omega_0$  value obtained using fluorescein (n = 9).

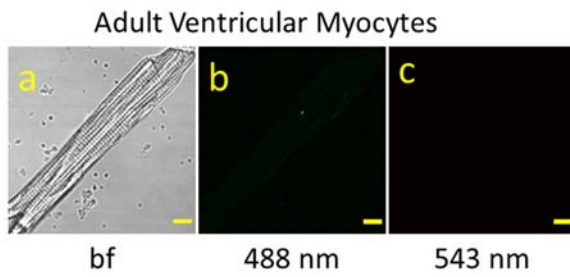

**Supplementary Fig. S2. Control cardiac myocytes do not exhibit autofluorescence.**

Representative bright field (a) and confocal images of control myocytes incubated with extracellular solution at 488 nm (b) and 543 nm (c). These experiments were repeated on three different days.

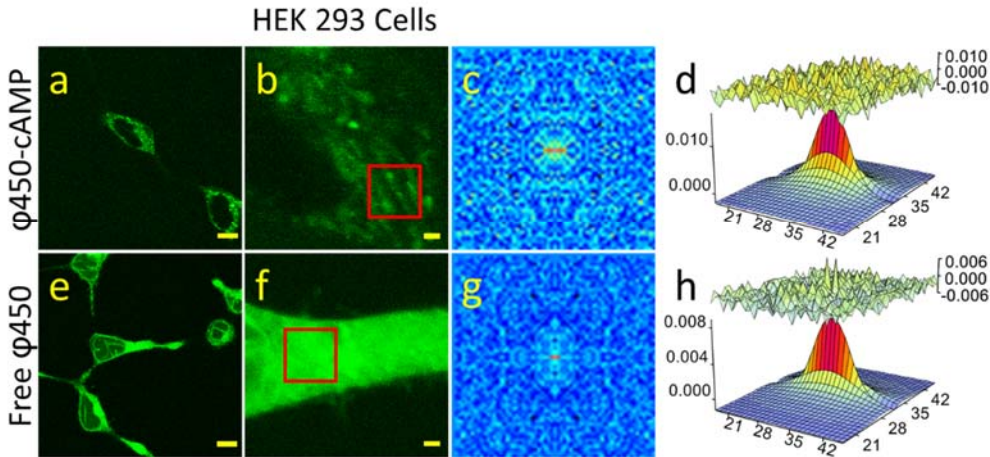

**Supplementary Fig.S3. RICS analysis of  $\phi 450$ -cAMP and free  $\phi 450$  in HEK293 cells.** Representative confocal images of  $\phi 450$ -cAMP (a, b) and free  $\phi 450$  (e, f) in HEK293 cells at low (a and e, scale bar 10  $\mu\text{m}$ ) and high (b and f, scale bar 1  $\mu\text{m}$ ) magnification. (c, g) Average of the spatial correlation calculated for a region of 64 X 64 pixels (indicated by the red box in b, f) for each of 100 images of  $\phi 450$ -cAMP (c) and free  $\phi 450$  (g) in HEK293 cells. (d, h) Fit of the correlation functions. The plot at the top of those panels represents the difference between the autocorrelation and the fit.

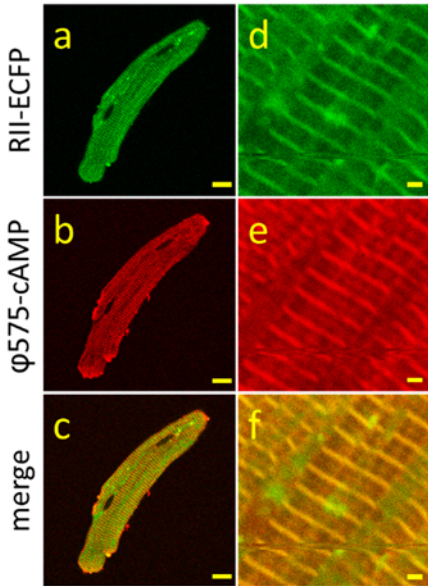

**Supplementary Fig. S4. Co-localization of  $\phi 575$ -cAMP with the type II regulatory subunit (RII) of PKA in adult ventricular cardiac myocytes.**

Confocal images of myocytes expressing RII-ECFP (a, d) or loaded with  $\phi 575$ -cAMP (b, e) at low (left panels, scale bar 10  $\mu\text{m}$ ) and high (right panels, scale bar 1  $\mu\text{m}$ ) magnification. The merged images (c, f) demonstrate a high degree of co-localization between RII-ECFP and  $\phi 575$ -cAMP. This example illustrates cells exhibiting a horizontal RII-EGFP expression pattern, in addition to the more commonly observed longitudinal pattern (see figure 4). Note that  $\phi 575$ -cAMP co-localizes with both. This pattern was observed in 3 out of 12 myocytes isolated from three different animals.

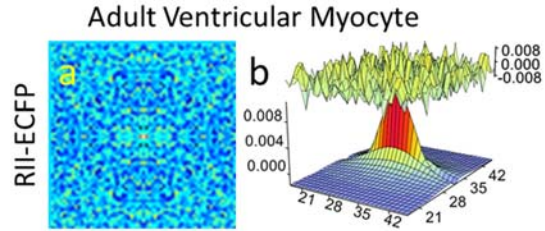

**Supplementary Fig. S5. RICS analysis of RII-ECFP in an adult ventricular cardiac myocyte.**

(a) Average of the spatial correlation calculated for a region of 64 X 64 pixels for each of 100 images of the RII-ECFP expressing myocyte. (b) Fit of the correlation functions for RII-ECFP. The plot at the top of that panel represents the difference between the autocorrelation and the fit.

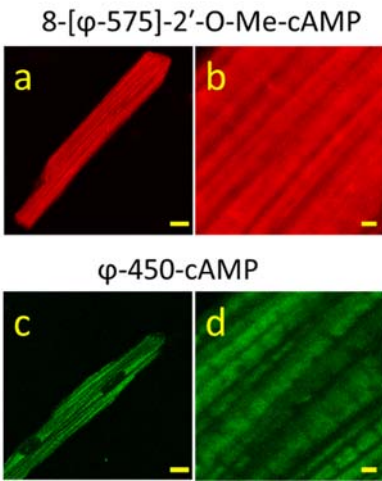

**Supplementary Fig. S6. Confocal imaging of adult ventricular myocyte loaded with 8-[ $\phi$ -575]-2'-O-Me-cAMP or  $\phi$ 450-cAMP.**

Representative confocal images of a cardiac myocyte loaded with 8-[ $\phi$ -575]-2'-O-Me-cAMP (upper panels, n = 36) or  $\phi$ 450-cAMP (lower panels) at low (a, c, scale bar 10  $\mu$ m) and high (b, d, scale bar 1  $\mu$ m) magnification. These experiments were repeated using myocytes isolated from three different animals.

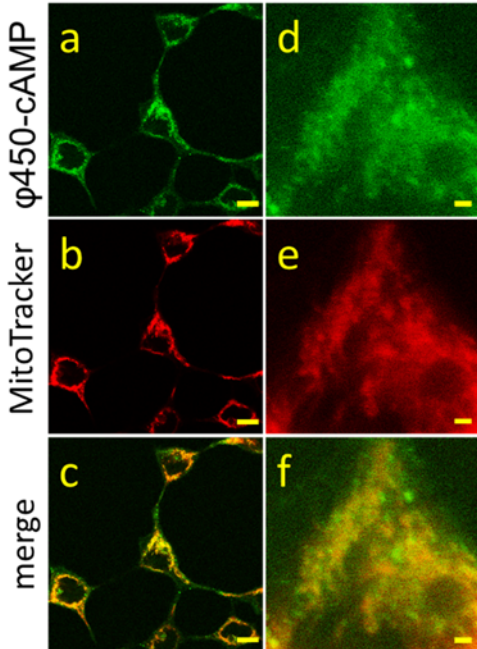

**Supplementary Fig. S7. Co-localization of  $\phi$ 450-cAMP with MitoTracker red in HEK 293 cells.** Representative confocal images of HEK 293 cells loaded with  $\phi$ 450-cAMP (a, d) and MitoTracker red (b, e) at low (a – c, scale bar 10  $\mu$ m) and high (d – f, scale bar 1  $\mu$ m) magnification. The merged images (c, f) demonstrate a high degree of co-localization of  $\phi$ 450-cAMP with MitoTracker red. PCC  $0.42 \pm 0.0042$ , tM1  $0.58 \pm 0.0076$ , tM2  $0.60 \pm 0.0064$ , n=13.



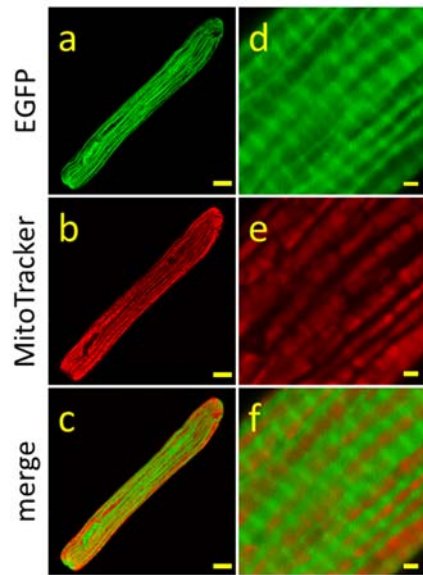

**Supplementary Fig. S8. Confocal imaging of an EGFP-expressing adult ventricular cardiac myocyte loaded with MitoTracker red.**

Representative confocal images of a cardiac myocyte expressing EGFP (a, d) and loaded with MitoTracker red (b, e) at low (a – c, scale bar 10  $\mu\text{m}$ ) and high (d – f, scale bar 1  $\mu\text{m}$ ) magnification. The merged images (c, f) of MitoTracker red with EGFP demonstrate that the EGFP expression is excluded from the regions that are occupied by the mitochondria in myocytes. PCC  $-0.38 \pm 0.012$ ,  $n=9$ .

**Supplementary Table S1. Intracellular concentrations of various fluorophores obtained from RICS analysis in adult cardiac myocytes and HEK293 cells**

| Fluorophore                        | Myocytes   |              | HEK293 cells |               |
|------------------------------------|------------|--------------|--------------|---------------|
|                                    | Range (nM) | Average (nM) | Range (nM)   | Average (nM)  |
| <b>[<math>\phi</math>450-cAMP]</b> | 180 – 960  | 639 $\pm$ 19 | 30 – 350     | 130 $\pm$ 6.1 |
| <b>[EGFP]</b>                      | 130 – 910  | 396 $\pm$ 64 | 40 – 690     | 245 $\pm$ 53  |
| <b>[Free <math>\phi</math>450]</b> | 160 – 1010 | 676 $\pm$ 47 | 190 – 920    | 471 $\pm$ 53  |
| <b>[Fluorescein]</b>               | 360 – 1050 | 749 $\pm$ 84 | 730 – 870    | 820 $\pm$ 44  |
